# Supplementary material
Source: Springer Nature journal article supplement (http://springerprofessional.de/resource/supplementary/40702_2024_1052_MOESM2_ESM.pdf/26806328)

## 1. Individuelle Lernentwicklung und -unterstützung

Du

Als Lehrer mit langjähriger Berufserfahrung unterrichtest du eine siebte Klasse in Mathematik. Der Mathematikunterricht findet jeden Wochentag statt. Es gibt leistungsstarke und leistungsschwache Schüler. Laura, Petra, Lars und Tim sind leistungsstark. Ingo, Ulf, Elisabeth und Christina sind leistungsschwach. Gerne würdest Du ein Peer Tutorien Konzept umsetzen. Wie müssen die Schüler zusammengestellt werden und nach welchem Zeitplan sollen die Gruppen geändert werden, damit insgesamt ein optimales Lernergebnis erreicht wird? Gib die Gruppenzuordnungen abhängig vom Wochentag für eine ganze Schulwoche aus.

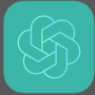

Um das Peer-Tutorien-Konzept umzusetzen und ein optimales Lernergebnis für die Schüler zu erreichen, könnten die Schüler in gemischte Gruppen aufgeteilt werden, in denen leistungsstarke Schüler mit leistungsschwachen Schülern zusammenarbeiten. Basierend auf den Informationen, die du gegeben hast, könnten die Gruppen wie folgt zusammengestellt werden:

Montag:

Laura (leistungsstark) mit Ingo (leistungsschwach)

Petra (leistungsstark) mit Ulf (leistungsschwach)

Lars (leistungsstark) mit Elisabeth (leistungsschwach)

Tim (leistungsstark) mit Christina (leistungsschwach)

Dienstag:

Laura (leistungsstark) mit Ulf (leistungsschwach)

Petra (leistungsstark) mit Elisabeth (leistungsschwach)

Lars (leistungsstark) mit Christina (leistungsschwach)

Tim (leistungsstark) mit Ingo (leistungsschwach)

Mittwoch:

Laura (leistungsstark) mit Elisabeth (leistungsschwach)

Petra (leistungsstark) mit Christina (leistungsschwach)

Lars (leistungsstark) mit Ingo (leistungsschwach)

Tim (leistungsstark) mit Ulf (leistungsschwach)

Donnerstag:

Laura (leistungsstark) mit Christina (leistungsschwach)

Petra (leistungsstark) mit Ingo (leistungsschwach)

Lars (leistungsstark) mit Ulf (leistungsschwach)

Tim (leistungsstark) mit Elisabeth (leistungsschwach)

Freitag:

Laura (leistungsstark) mit Ingo (leistungsschwach)

Petra (leistungsstark) mit Ulf (leistungsschwach)

Lars (leistungsstark) mit Elisabeth (leistungsschwach)

Tim (leistungsstark) mit Christina (leistungsschwach)

Die Gruppenzuordnungen basieren auf dem Wechsel der leistungsstarken Schüler, während die leistungsschwachen Schüler in den Gruppen bleiben. Dadurch erhalten die leistungsschwachen Schüler die Möglichkeit, mit verschiedenen leistungsstarken Schülern zusammenzuarbeiten und von deren Kenntnissen zu profitieren.

Es ist wichtig zu beachten, dass diese Aufteilung auf Annahmen basiert und individuelle Lernbedürfnisse und -präferenzen der Schüler berücksichtigt werden sollten. Es könnte auch sinnvoll sein, regelmäßige Feedbackschleifen mit den Schülern durchzuführen, um sicherzustellen, dass das Peer-Tutorien-Konzept effektiv ist und die gewünschten Lernergebnisse erzielt werden.

Send a message.

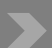

## 2. Lernüberprüfungen und Leistungsbewertungen

Du

Als Lehrer mit langjähriger Berufserfahrung unterrichtest du eine siebte Klasse in Deutsch. Erstelle eine Klausur zum Roman „Wir Kinder vom Bahnhof Zoo“ von Christiane Felscherinow. Die Klausur soll einen Umfang von 120 Minuten haben und 120 Punkte beinhalten. Gib die Aufgaben mit Musterlösung aus.

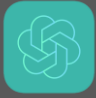

Klausur: "Wir Kinder vom Bahnhof Zoo" von Christiane Felscherinow

Gesamtpunktzahl: 120 Punkte Bearbeitungszeit: 120 Minuten

**Aufgabe 1: Charakterisierung (20 Punkte)** Charakterisiere die Hauptfigur Christiane Felscherinow anhand von drei wesentlichen Merkmalen aus dem Roman. Begründe deine Auswahl mit Zitaten aus dem Text.

Musterlösung: Christiane Felscherinow ist eine komplexe Hauptfigur des Romans "Wir Kinder vom Bahnhof Zoo". Ein wesentliches Merkmal ist ihre rebellische Natur. Dies zeigt sich in ihrer Abneigung gegenüber der bürgerlichen Gesellschaft und ihrem Widerstand gegen autoritäre Strukturen. Ein Zitat, das dies verdeutlicht, ist: "Ich wollte nicht so werden wie meine Eltern. Mich anpassen, arbeiten, Geld verdienen, spießig sein. Das war nicht mein Ding" (Seite 15). Ein weiteres Merkmal ist ihre Abhängigkeit von Drogen. Christiane entwickelt im Laufe des Romans eine Sucht nach Heroin, die ihr Leben zunehmend beherrscht. Ein Zitat, das dies illustriert, ist: "Der Stoff wird immer wichtiger. Ich brauche ihn, wie ich Luft zum Atmen brauche" (Seite 73). Trotz ihrer Abhängigkeit zeigt Christiane auch eine innere Stärke und den Willen, aus ihrer Situation auszubrechen. Ein Zitat, das dies verdeutlicht, ist: "Ich will da raus. Ich will ein normales Leben führen" (Seite 108).

**Aufgabe 2: Handlungsverlauf (30 Punkte)** Beschreibe den Handlungsverlauf des Romans in chronologischer Reihenfolge. Nenne dabei die wichtigsten Ereignisse und ihre Bedeutung für die Entwicklung der Hauptfigur. Verwende mindestens fünf Ereignisse aus verschiedenen Phasen des Romans.

Musterlösung: Der Roman "Wir Kinder vom Bahnhof Zoo" erzählt die Geschichte von Christiane Felscherinow und ihrem Leben als drogenabhängige Jugendliche in Berlin. Der Handlungsverlauf lässt sich wie folgt zusammenfassen:

Christiane lernt in der Diskothek Sound die Szene rund um den Bahnhof Zoo kennen. Sie ist fasziniert von der Freiheit und dem Rausch der Musik. Bedeutung: Dieses Ereignis markiert den Einstieg in Christianes drogenabhängige Lebensweise.

Christiane macht erste Erfahrungen mit Drogen, insbesondere mit Haschisch und LSD. Bedeutung: Der Konsum von Drogen wird für Christiane zur Flucht aus der Realität und führt zu einer zunehmenden Abhängigkeit.

Christiane trifft Detlef, einen jungen Dealer, der zu ihrem Freund und Liebhaber wird. Bedeutung: Detlef wird zu einem wichtigen Einfluss auf Christianes Leben und treibt ihre Drogensucht weiter voran.

Christiane erlebt den Tod ihres Freundes Babsi, der an einer Überdosis stirbt. Bedeutung: Dieses Ereignis erschüttert Christiane zutiefst und verdeutlicht ihr die Gefahren und Konsequenzen des Drogenkonsums.

Christiane wird von ihrer Familie verstoßen und lebt nun auf der Straße. Bedeutung: Dieser Wendepunkt zwingt Christiane, sich mit den Folgen ihrer Sucht auseinanderzusetzen und nach einem Ausweg zu suchen.

**Aufgabe 3: Themen und Botschaften (30 Punkte)** Beschreibe drei zentrale Themen des Romans "Wir Kinder vom Bahnhof Zoo" und erläutere ihre Bedeutung für das Verständnis der Botschaft des Autors.

Musterlösung: Der Roman "Wir Kinder vom Bahnhof Zoo" behandelt eine Vielzahl von Themen, die das Verständnis der Botschaft des Autors bereichern. Drei zentrale Themen sind:

1. Drogenabhängigkeit und Sucht: Das Thema der Drogenabhängigkeit ist allgegenwärtig im Roman und zeigt die destruktive Kraft von Drogen auf das Leben junger Menschen. Die Autorin möchte damit auf die Gefahren des Drogenkonsums aufmerksam machen und ein Bewusstsein dafür schaffen, wie leicht man in eine Abhängigkeit geraten kann.
2. Verlorenheit und Sehnsucht nach Zugehörigkeit: Die Protagonistin Christiane fühlt sich in der bürgerlichen Gesellschaft nicht verstanden und sucht in der Drogenszene nach einem Gefühl der Zugehörigkeit. Das Thema der Verlorenheit zeigt, wie junge Menschen nach Identität und einem Ort suchen, an dem sie akzeptiert werden. Gleichzeitig verdeutlicht es die Wichtigkeit von sozialer Unterstützung und familiärem Zusammenhalt.
3. Hoffnung und der Wunsch nach Veränderung: Trotz der düsteren Realität und den negativen Auswirkungen der Drogenabhängigkeit zeigt der Roman auch den inneren Kampf von Christiane und ihren Wunsch, ein normales Leben zu führen. Dieses Thema verdeutlicht die menschliche Fähigkeit zur Resilienz und Veränderung.
4. Diese Themen vermitteln die Botschaft, dass Drogenabhängigkeit ein ernstes Problem ist, aber dass es immer Hoffnung auf Veränderung und ein besseres Leben gibt.

**Aufgabe 4: Vergleich mit der heutigen Jugend (40 Punkte)** Vergleiche das Leben und die Probleme der Jugendlichen im Roman mit den Herausforderungen, denen heutige Jugendliche gegenüberstehen. Zeige Gemeinsamkeiten und Unterschiede auf und erläutere, inwiefern der Roman auch für die heutige Zeit relevant ist.

Musterlösung: Das Leben und die Probleme der Jugendlichen im Roman "Wir Kinder vom Bahnhof Zoo" weisen Parallelen zu den Herausforderungen auf, mit denen heutige Jugendliche konfrontiert sind. Beide Gruppen haben mit folgenden Aspekten zu kämpfen:

1. Sucht und Drogenkonsum: Sowohl im Roman als auch in der heutigen Zeit sind Sucht und Drogenkonsum ernsthafte Probleme für viele Jugendliche. Die Versuchungen und der Druck, sich anzupassen oder zu entfliehen, können zu ähnlichen Abhängigkeiten führen.
2. Identitätssuche und Zugehörigkeit: Jugendliche suchen auch heute nach ihrer Identität und einem Ort, an dem sie sich akzeptiert fühlen. Das Bedürfnis nach Zugehörigkeit kann junge Menschen dazu verleiten, sich in bestimmten Szenen oder Gruppen zu engagieren.
3. Familienkonflikte und fehlende Unterstützung: Sowohl im Roman als auch in der heutigen Zeit können Jugendliche mit familiären Konflikten und mangelnder Unterstützung konfrontiert sein, was sie in eine isolierte und verletzte Position bringt.

Der Roman bleibt auch für die heutige Zeit relevant, da er auf die universellen Herausforderungen hinweist, mit denen Jugendliche konfrontiert sind. Er zeigt, dass die Suche nach Identität, das Verlangen nach Zugehörigkeit und die Schwierigkeiten im Umgang mit Sucht und familiären Problemen zeitlose Themen sind.

Hinweis: Die Musterlösungen sind beispielhaft und können je nach individueller Interpretation variieren.

Send a message.

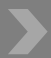

### 3. Unterrichtsvorbereitung (inhaltlich)

Du

Als Lehrer mit langjähriger Berufserfahrung unterrichtest du eine siebte Klasse in Biologie. Erstelle einen Plan für eine 90-minütige Unterrichtsstunde zum Thema „Einführung in die Verschiedenen Pflanzenarten“ und gebe inhaltliche Stichpunkte zu jedem Planungspunkt. Gib nur den Plan aus.

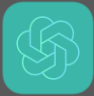

90-minütige Unterrichtsstunde: Einführung in die verschiedenen Pflanzenarten

I. Einführung (10 Minuten) A. Begrüßung der Schüler B. Erklärung des Unterrichtsthemas und seiner Bedeutung C. Aktivierung des Vorwissens der Schüler über Pflanzen

II. Klassifizierung von Pflanzen (20 Minuten) A. Erläuterung der Grundlagen der Pflanzenklassifizierung B. Vorstellung der Hauptkategorien von Pflanzen: 1. Blütenpflanzen (Angiospermen) 2. Nacktsamer (Gymnospermen) 3. Farne und Moose (Pteridophyten) 4. Algen (Thallophyten) C. Besprechung der Merkmale und Beispiele jeder Kategorie

III. Blütenpflanzen (30 Minuten) A. Vertiefte Untersuchung von Blütenpflanzen B. Erläuterung der wichtigsten Merkmale von Blütenpflanzen: 1. Blütenstruktur 2. Fortpflanzung durch Samen 3. Anpassung an verschiedene Lebensräume C. Präsentation ausgewählter Beispiele von Blütenpflanzen D. Diskussion der Bedeutung von Blütenpflanzen für die Menschen und die Umwelt

IV. Andere Pflanzenarten (25 Minuten) A. Kurzer Überblick über die anderen Pflanzenkategorien B. Erläuterung der Merkmale und Beispiele von Nacktsamern, Farnen und Moosen, und Algen C. Betonung der ökologischen Bedeutung jeder Pflanzenart

V. Zusammenfassung und Reflexion (5 Minuten) A. Zusammenfassung der wichtigsten Punkte der Unterrichtsstunde B. Gelegenheit für Fragen und Klärung von Unklarheiten C. Reflexion der gelernten Inhalte und Verbindung zur realen Welt

VI. Hausaufgaben (5 Minuten) A. Aufgabe zur Festigung des Gelernten B. Abgabe der Hausaufgabenrichtlinien

Hinweis: Die genauen Zeitangaben können je nach Unterrichtstempo und Diskussionsbedarf variieren. Es wird empfohlen, die Stunde im Voraus zu planen und gegebenenfalls Anpassungen vorzunehmen, um sicherzustellen, dass alle Inhalte angemessen behandelt werden.

Send a message.

## 4. Unterrichtskoordination

Du

Als Lehrer mit langjähriger Berufserfahrung unterrichtest du eine siebte Klasse in Geschichte. Erstelle einen Lehrplan für ein Halbjahr zum Thema „Nationalsozialismus“. Gib nur den \*Lehrplan aus.

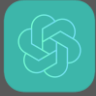

Lehrplan für das Halbjahr: Nationalsozialismus

Themen:

1. Einführung in den Nationalsozialismus
  - a. Entstehung und Aufstieg der NSDAP
  - b. Hitlers Machtergreifung
2. Ideologie und Propaganda des Nationalsozialismus
  - a. Rassenlehre und Eugenik
  - b. Antisemitismus und die "Endlösung"
  - c. Propagandamaschinerie des Dritten Reiches
3. Die Innenpolitik des nationalsozialistischen Deutschlands
  - a. Gleichschaltung und Unterdrückung
  - b. b. Hitler als Diktator
  - c. c. Alltag im nationalsozialistischen Deutschland
4. Die Außenpolitik des nationalsozialistischen Deutschlands
  - a. Expansionspolitik und Angriffskriege
  - b. Bündnisse und der Zweite Weltkrieg
  - c. Der Holocaust und die Besatzungspolitik
5. Widerstand und Verfolgung im Dritten Reich
  - a. Der Widerstand im Inland
  - b. Exil und internationale Reaktionen
  - c. Verfolgung von Minderheiten und Oppositionellen
6. Nürnberger Prozesse und Nachwirkungen des Nationalsozialismus
  - a. Die Nürnberger Prozesse und die Bestrafung der Kriegsverbrecher
  - b. Deutschland nach dem Zweiten Weltkrieg
  - c. Erinnerungskultur und Umgang mit der nationalsozialistischen Vergangenheit

Methoden und Aktivitäten:

- Vorlesungen und Diskussionen
- Lesen und Diskutieren von Primär- und Sekundärquellen
- Präsentationen von Schülern zu ausgewählten Themen
- Filme und Dokumentationen zum Nationalsozialismus
- Gruppenarbeiten und Projekte zur Vertiefung des Verständnisses
- Exkursionen zu relevanten Gedenkstätten oder Ausstellungen

Bewertung:

- Klassenbeteiligung und aktive Teilnahme an Diskussionen
- Schriftliche Arbeiten und Präsentationen
- Zusammenarbeit in Gruppenarbeiten und Projekten
- Verständnis von Schlüsselkonzepten und Ereignissen im Nationalsozialismus

Hinweis: Der Lehrplan kann je nach Schulprogramm und Zeitplan angepasst werden.

Send a message.

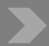

\*Anmerkung: ChatGPT hat in diesem Beispiel falsch interpretiert, was ein Lehrplan ist: Es handelt sich um einen reduzierten Stoffverteilungsplan und nicht um einen Lehrplan im klassischen Sinne.

## 5. Unterrichtsdurchführung

Du

Als Lehrer mit langjähriger Berufserfahrung unterrichtest du eine siebte Klasse. Du hast einen Problemschüler, der trotz mehrerer Maßnahmen weiterhin den Unterricht stört. Wie könntest du dieses Problem in den Griff bekommen?

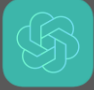

Wenn ich als Lehrer mit einem Problemschüler in meiner siebten Klasse konfrontiert wäre, der trotz mehrerer Maßnahmen weiterhin den Unterricht stört, würde ich verschiedene Ansätze in Betracht ziehen, um das Problem in den Griff zu bekommen. Hier sind einige mögliche Schritte:

1. Individuelle Gespräche: Ich würde mit dem Problemschüler persönlich sprechen, um herauszufinden, was hinter seinem störenden Verhalten steckt. Es ist wichtig, eine vertrauensvolle Beziehung aufzubauen und mögliche zugrundeliegende Probleme oder Schwierigkeiten zu identifizieren.
2. Elternkontakt: Eine enge Zusammenarbeit mit den Eltern ist von großer Bedeutung. Ich würde ein Treffen mit den Eltern arrangieren, um das Verhalten des Schülers zu besprechen und gemeinsam nach Lösungen zu suchen. Eltern können wertvolle Einblicke in das Verhalten ihres Kindes zu Hause geben und möglicherweise zur Lösung des Problems beitragen.
3. Individuelle Förderung: Der Problemschüler könnte möglicherweise von individueller Unterstützung oder zusätzlichen Ressourcen profitieren. Es könnte sinnvoll sein, ihn in einer ruhigeren Umgebung zu unterrichten oder spezielle Lernstrategien anzubieten, um seinen Lernbedürfnissen gerecht zu werden.
4. Positive Verstärkung: Anstatt sich ausschließlich auf negatives Verhalten zu konzentrieren, wäre es wichtig, positive Verstärkung einzusetzen. Ich würde das störende Verhalten des Schülers ignorieren und stattdessen sein positives Verhalten loben und belohnen. Dies könnte ihm Anreize bieten, sich angemessen zu verhalten und konzentriert am Unterricht teilzunehmen.
5. Klassenmanagement-Strategien: Als Lehrer würde ich verschiedene Klassenmanagement-Strategien anwenden, um ein positives und diszipliniertes Lernumfeld für die gesamte Klasse zu schaffen. Dies könnte beinhalten, klare Erwartungen zu kommunizieren, Regeln und Konsequenzen festzulegen sowie die Schüler in die Verantwortung für ihr eigenes Verhalten einzubeziehen.
6. Unterstützung durch Schulressourcen: Je nach den verfügbaren Ressourcen an der Schule könnte es sinnvoll sein, das Schulpsychologenteam oder andere Fachkräfte einzubeziehen, um den Problemschüler zu unterstützen. Diese Fachleute können zusätzliche Einblicke und Strategien liefern, um mit dem Verhalten des Schülers umzugehen.
7. Dokumentation und Kommunikation: Es ist wichtig, das Verhalten des Problemschülers genau zu dokumentieren und regelmäßige Kommunikation mit anderen Lehrern, der Schulleitung und gegebenenfalls Fachkräften zu pflegen. Durch den Austausch von Informationen kann ein umfassenderes Bild des Schülers entstehen und es können effektivere Lösungsansätze gefunden werden.

Es ist wichtig zu beachten, dass jeder Problemschüler und jede Situation einzigartig ist, daher kann es erforderlich sein, verschiedene Ansätze auszuprobieren und anzupassen, um das störende Verhalten in den Griff zu bekommen. Eine individuelle Herangehensweise und die Bereitschaft, flexibel zu sein, sind entscheidend, um langfristige Lösungen zu finden.

Send a message.

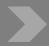

## 6. Ansprechperson

Du

Als Lehrer mit langjähriger Berufserfahrung unterrichtest du eine siebte Klasse. Einer deiner Schüler wirkt seit Tagen geistig abwesend und kann sich nicht auf den Unterricht konzentrieren. Erstelle eine Liste mit Maßnahmen, die du ergreifen könntest. Gib nur die Liste aus.

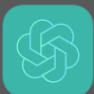

Ablaufplan:

1. Einen ruhigen Moment mit dem Schüler suchen, um ein Gespräch über seine Probleme oder Sorgen zu führen.
2. Den Schüler ermutigen, seine Gedanken und Gefühle zu teilen, um mögliche Stressfaktoren oder persönliche Schwierigkeiten zu identifizieren.
3. Den Schüler ermutigen, sich an den Schulpsychologen oder Berater zu wenden, um weitere Unterstützung zu erhalten.
4. Überprüfen, ob der Schüler möglicherweise Schwierigkeiten im Fach hat und zusätzliche Hilfe oder Nachhilfe anbieten.
5. Die Eltern des Schülers kontaktieren und sie über die Beobachtungen informieren, um mögliche Unterstützung zu Hause zu gewährleisten.
6. Mit anderen Lehrern oder Fachkollegen über die Situation sprechen, um mögliche Anregungen oder Unterstützung zu erhalten.
7. Kreative Unterrichtsmethoden und verschiedene Lernaktivitäten einsetzen, um das Interesse des Schülers zu wecken.
8. Den Schüler ermutigen, regelmäßig Pausen einzulegen und sich körperlich zu betätigen, um die Konzentration zu verbessern.
9. Zusätzliche Ressourcen oder Materialien bereitstellen, die dem Schüler helfen, den Unterrichtsstoff besser zu verstehen.
10. Positive Verstärkung und Lob verwenden, um das Selbstvertrauen des Schülers zu stärken und sein Engagement für den Unterricht zu fördern.

## 7. Nachbereitung

Du

Als Lehrer mit langjähriger Berufserfahrung erstellst du eine Vorlage mit welcher der Unterricht am besten reflektiert und nachbereitet werden kann.

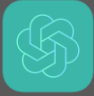

Vorlagen für die Reflexion und Nachbereitung des Unterrichts können Lehrkräften dabei helfen, den Unterricht kritisch zu analysieren, Stärken und Schwächen zu identifizieren und zukünftige Verbesserungen vorzunehmen. Hier ist eine Vorlage, die als Ausgangspunkt dienen kann:

1. Unterrichtsdatum und Thema:
  - a. Datum des Unterrichts
  - b. Das behandelte Thema oder die Lektion
2. Unterrichtsziele:
  - a. Welche Ziele wurden für den Unterricht festgelegt?
  - b. Wurden diese Ziele erreicht?
3. Unterrichtsplanung:
  - a. Welche Ressourcen wurden für die Unterrichtsvorbereitung verwendet?
  - b. Welche Aktivitäten und Methoden wurden geplant?
4. Unterrichtsdurchführung:
  - a. Wie wurde der Unterricht gestaltet? Beschreibe den Ablauf.
  - b. Gab es Herausforderungen oder unvorhergesehene Ereignisse?
  - c. Wie wurden die Schülerinnen und Schüler aktiv einbezogen?
5. Schülerleistung und -engagement:
  - a. Wie haben die Schülerinnen und Schüler auf den Unterricht reagiert?
  - b. Wurden die Lernziele von den Schülerinnen und Schülern erreicht?
  - c. Gab es Anzeichen von Verwirrung oder Desinteresse?
6. Feedback und Beobachtungen:
  - a. Gab es Feedback von den Schülerinnen und Schülern? Wenn ja, was wurde gesagt?
  - b. Welche besonderen Beobachtungen wurden während des Unterrichts gemacht?
7. Stärken und Schwächen:
  - a. Welche Aspekte des Unterrichts waren besonders effektiv und erfolgreich?
  - b. Welche Schwächen oder Verbesserungsmöglichkeiten wurden identifiziert?
8. Reflexion:
  - a. Was hat gut funktioniert und sollte beibehalten werden?
  - b. Was könnte verbessert werden? Welche Anpassungen sollten vorgenommen werden?
  - c. Welche Lehren wurden aus dem Unterricht gezogen?
9. Aktionsplan:
  - a. Welche konkreten Schritte sollten unternommen werden, um den Unterricht zu verbessern?
  - b. Welche Maßnahmen sollen ergriffen werden, um den Unterrichtsplan anzupassen?
10. Nächste Schritte:
  - a. Wann wird der überarbeitete Unterrichtsplan umgesetzt?
  - b. Welche weiteren Schritte sind erforderlich?

Diese Vorlage dient als Ausgangspunkt und kann nach Bedarf angepasst werden. Sie ermöglicht eine systematische Reflexion und Nachbereitung des Unterrichts, um kontinuierliche Verbesserungen zu fördern.

Send a message.

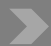

## 8. Förderstatus

Du

Als Lehrer mit langjähriger Berufserfahrung unterrichtest du eine siebte Klasse in Deutsch. Erstelle eine Liste von Fördermaßnahmen für einen Schüler mit dem Förderstatus „Hören“. Gib nur die Liste aus.

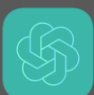

Fördermaßnahmen für einen Schüler mit dem Förderstatus "Hören":

1. Verwendung von visuellen Hilfsmitteln wie Bilder, Diagramme und Videos, um den Unterrichtsinhalt zu unterstützen.
2. Einsatz von Untertiteln oder Transkriptionen bei Videos oder Hörtexten, um dem Schüler das Verständnis zu erleichtern.
3. Verstärkung der mündlichen Anweisungen durch schriftliche Notizen auf dem Whiteboard oder über digitale Medien.
4. Sitzplatz in der Nähe des Lehrers, um eine bessere Hörbarkeit sicherzustellen und Fragen oder Unklarheiten direkt ansprechen zu können.
5. Bereitstellung von Hörübungen und -aufgaben in schriftlicher Form, damit der Schüler sie in seinem eigenen Tempo bearbeiten kann.
6. Einbeziehung von Gruppenarbeit, um die Kommunikation und Interaktion mit anderen Schülern zu fördern und verschiedene Perspektiven zu erhalten.
7. Nutzung von Technologie wie FM-Anlagen oder Hörgeräten, um die Klangqualität und das Hörerlebnis des Schülers zu verbessern.
8. Regelmäßige Überprüfung des Hörvermögens des Schülers durch Fachpersonal, um sicherzustellen, dass die Unterstützungsmaßnahmen angemessen sind.
9. Ermutigung des Schülers, Fragen zu stellen und sich bei Schwierigkeiten oder Unklarheiten offen mit dem Lehrer auszutauschen.
10. Sensibilisierung der anderen Schüler für die Bedürfnisse des hörgeschädigten Schülers und Förderung eines inklusiven Klassenklimas.

Bitte beachte, dass diese Liste allgemeine Empfehlungen darstellt und die individuellen Bedürfnisse des Schülers berücksichtigt werden sollten. Es ist ratsam, mit Fachpersonal, wie Audiologen oder Sonderpädagogen, zusammenzuarbeiten, um spezifische Maßnahmen für den einzelnen Schüler zu entwickeln.

Send a message.

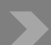

## 9. Außerschulische Aktivitäten

Du

Als Lehrer mit langjähriger Berufserfahrung unterrichtest du eine siebte Klasse. Erstelle eine Liste mit pädagogisch sinnvollen Ausflugszielen für eine fünftägige Klassenfahrt nach Berlin. Gib Begründungen für die Ziele an. Gib nur die Liste aus.

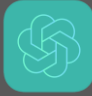

Vorlagen für die Reflexion und Nachbereitung des Unterrichts können Lehrkräften dabei helfen, den Unterricht kritisch zu analysieren, Stärken und Schwächen zu identifizieren und zukünftige Verbesserungen vorzunehmen. Hier ist eine Vorlage, die als Ausgangspunkt dienen kann:

1. Brandenburger Tor: Das Brandenburger Tor ist ein historisches Symbol Berlins und ein wichtiges Denkmal. Es bietet den Schülern die Möglichkeit, mehr über die Geschichte und Bedeutung des Tors zu erfahren.
2. Reichstag: Der Besuch des Reichstags ermöglicht den Schülern einen Einblick in die politische Struktur Deutschlands. Sie können das Parlament besichtigen und mehr über die demokratischen Prozesse erfahren.
3. Museumsinsel: Die Museumsinsel bietet eine Vielzahl von renommierten Museen wie das Pergamonmuseum und das Ägyptische Museum. Die Schüler können historische Artefakte und Kunstwerke aus verschiedenen Epochen erkunden.
4. East Side Gallery: Als längstes zusammenhängendes Stück der Berliner Mauer bietet die East Side Gallery den Schülern die Möglichkeit, die Geschichte der deutschen Teilung zu erleben und die künstlerischen Graffiti-Werke zu bewundern.
5. Holocaust-Mahnmal: Das Holocaust-Mahnmal ist eine beeindruckende Gedenkstätte, die an die Opfer des Holocaust erinnert. Die Schüler können hier über die Schrecken des Zweiten Weltkriegs und die Bedeutung der Erinnerungskultur reflektieren.
6. Checkpoint Charlie: Checkpoint Charlie war einer der bekanntesten Grenzübergänge während der Teilung Berlins. Ein Besuch ermöglicht es den Schülern, die Geschichte des Kalten Krieges zu verstehen und sich mit der Zeit des geteilten Deutschlands auseinanderzusetzen.
7. Berliner Dom: Der Berliner Dom ist ein architektonisches Meisterwerk und eine bedeutende Sehenswürdigkeit. Die Schüler können die imposante Kuppel erkunden und mehr über die Geschichte der Kirche erfahren.
8. Jüdisches Museum: Das Jüdische Museum bietet eine umfangreiche Sammlung, die sich mit der jüdischen Geschichte und Kultur in Deutschland auseinandersetzt. Die Schüler können hier einen Einblick in die jüdische Gemeinschaft und ihre Bedeutung für Berlin gewinnen.
9. Zoologischer Garten Berlin: Der Zoologische Garten Berlin ist der älteste Zoo Deutschlands und bietet eine große Vielfalt an Tierarten. Die Schüler haben die Möglichkeit, Tiere aus verschiedenen Kontinenten zu beobachten und mehr über den Artenschutz zu erfahren.
10. Potsdamer Platz: Als lebhafter Platz mit moderner Architektur, Restaurants und Geschäften bietet der Potsdamer Platz den Schülern einen Einblick in das moderne Berlin. Hier können sie die dynamische Atmosphäre der Stadt erleben.
11. Gedenkstätte Berliner Mauer: Die Gedenkstätte Berliner Mauer ermöglicht es den Schülern, die historischen Überreste der Mauer zu sehen und mehr über die Auswirkungen der Teilung auf die Menschen in Ost- und Westberlin zu erfahren.
12. Charlottenburg Palace: Charlottenburg Palace ist das größte Schloss in Berlin und ein beeindruckendes Beispiel des Barockstils. Die Schüler können durch die prachtvollen Räume und den Schlossgarten spazieren und einen Einblick in das Leben des preußischen Adels erhalten.

Bitte beachte, dass dies eine generierte Liste ist und bei der Planung einer Klassenfahrt die Verfügbarkeit der Attraktionen und die Altersbeschränkungen berücksichtigt werden sollten.

Send a message.

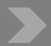

## 10. Arbeit mit Erziehungsberechtigten

Du

Als Lehrer mit langjähriger Berufserfahrung unterrichtest du eine siebte Klasse. Du hast einen Brief an die Eltern eines Schülers geschrieben, diese Sprechen aber nur schlecht Deutsch. Übersetze den Brief in sehr einfache Sprache, gib nur den Brief aus. „Brief von oben“

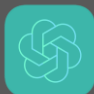

Liebe Eltern,

ich hoffe, es geht Ihnen gut. Ich möchte Ihnen für Ihren Brief danken und Ihre Anliegen zum Thema Noten verstehen. Es ist wichtig, dass Lehrer und Eltern miteinander sprechen, um den Schülern zu helfen.

Ich möchte betonen, dass ich fair bewerte, basierend auf den Leistungen der Schüler. Ich berücksichtige mündliche Beiträge, schriftliche Arbeiten, Hausaufgaben und Tests.

Die Noten zeigen den Gesamtfortschritt Ihres Kindes in Deutsch. Mein Ziel ist es, ein faires Bewertungssystem zu haben.

Sie haben das Recht, sich über die Leistungen Ihres Kindes zu informieren. Ich lade Sie herzlich zu einem Gespräch ein, um über Fortschritte und Verbesserungen zu sprechen.

Ich arbeite daran, die individuellen Bedürfnisse und Fähigkeiten der Schüler zu erkennen und zu unterstützen. Meine Noten sind sorgfältig überlegt, um gerecht zu sein.

Vielen Dank, dass Sie Ihre Bedenken mit mir geteilt haben. Ich bin offen für weitere Gespräche und Fragen. Zusammen können wir Ihr Kind bestmöglich unterstützen.

Mit freundlichen Grüßen,  
[Dein Name]

Send a message.

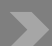

## 11. Beratung

Du

Als Lehrer mit langjähriger Berufserfahrung hat du einen Schüler der kurz vor dem Abschluss Probleme mit seiner Zukunftsgestaltung bezüglich des Berufs hat. Erstelle eine Liste mit Vorschlägen wie man diesen Schüler unterstützen könnte, gib nur die Liste aus.

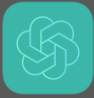

Vorlagen für die Reflexion und Nachbereitung des Unterrichts können Lehrkräften dabei helfen, den Unterricht kritisch zu analysieren, Stärken und Schwächen zu identifizieren und zukünftige Verbesserungen vorzunehmen. Hier ist eine Vorlage, die als Ausgangspunkt dienen kann:

1. Eine Karriereberatung anbieten, um gemeinsam die Interessen, Fähigkeiten und Ziele des Schülers zu erkunden.
2. Eine Liste mit verschiedenen Berufsfeldern und deren Anforderungen erstellen, um dem Schüler einen Überblick zu verschaffen.
3. Informationen über verschiedene Ausbildungsmöglichkeiten (z.B. duale Ausbildung, Berufsschule, Fachhochschule, Universität) bereitstellen.
4. Gastredner aus verschiedenen Berufsfeldern in die Schule einladen, um den Schülern Einblicke in verschiedene Karrierewege zu geben.
5. Praktika oder Jobshadowing-Möglichkeiten bei Unternehmen oder Organisationen in relevanten Bereichen anbieten.
6. Den Schüler ermutigen, sich über Stipendien und finanzielle Unterstützungsmöglichkeiten für die Ausbildung oder das Studium zu informieren.
7. Berufsmessen oder Karrieretage organisieren, um den Schülern die Chance zu geben, direkt mit Vertretern aus der Arbeitswelt in Kontakt zu treten.
8. Hilfestellung bei der Erstellung von Bewerbungsunterlagen (Lebenslauf, Anschreiben) und bei der Vorbereitung auf Vorstellungsgespräche geben.
9. Einen Mentor oder eine Mentoring-Programm vermitteln, um dem Schüler eine persönliche Begleitung bei der Berufsfindung zu bieten.
10. Den Schüler ermutigen, über seine Ziele und Interessen nachzudenken und dabei auch alternative Wege oder Berufe in Betracht zu ziehen.
11. Informationen über Weiterbildungsmöglichkeiten während der Berufstätigkeit bereitstellen, um den Schüler über lebenslanges Lernen zu informieren.
12. Den Schüler ermutigen, Praktika oder Teilzeitjobs in verschiedenen Branchen auszuprobieren, um praktische Erfahrungen zu sammeln und Einblicke in verschiedene Arbeitsumfelder zu erhalten.
13. Eine Plattform oder Ressourcen bereitstellen, auf der der Schüler Informationen über aktuelle Arbeitsmarktbedingungen, Berufsaussichten und Trends finden kann.
14. Den Schüler ermutigen, mit Berufstätigen in Bereichen, die ihn interessieren, Interviews zu führen, um mehr über deren Erfahrungen und Herausforderungen zu erfahren.
15. Unterstützung bei der Erstellung eines persönlichen Entwicklungsplans bieten, der dem Schüler dabei hilft, seine Ziele zu definieren und die notwendigen Schritte zur Erreichung dieser Ziele zu planen.

Send a message.

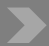

## 12. Inklusion und Schulentwicklung

Du

Als Lehrer mit langjähriger Berufserfahrung erstellst du eine Liste mit Rahmenbedingungen, die es zu erfüllen gilt, um eine inklusive Schule zu sein. Gib nur die Liste aus.

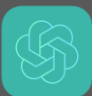

Vorlagen für die Reflexion und Nachbereitung des Unterrichts können Lehrkräften dabei helfen, den Unterricht kritisch zu analysieren, Stärken und Schwächen zu identifizieren und zukünftige Verbesserungen vorzunehmen. Hier ist eine Vorlage, die als Ausgangspunkt dienen kann:

1. Barrierefreiheit: Die Schule sollte über barrierefreie Zugänge, Aufzüge, Rampen und behindertengerechte Toiletten verfügen, um den Zugang für Schülerinnen und Schüler mit körperlichen Einschränkungen zu erleichtern.
2. Individualisierung: Die Schule sollte individuelle Lernpläne und Unterstützung für Schülerinnen und Schüler mit besonderen Bedürfnissen anbieten, um sicherzustellen, dass sie ihr volles Potenzial entfalten können.
3. Lehr- und Lernmaterialien: Die Schule sollte über vielfältige Lehr- und Lernmaterialien verfügen, die verschiedene Lernstile und -bedürfnisse berücksichtigen, um allen Schülerinnen und Schülern gerecht zu werden.
4. Fachliche Unterstützung: Es sollte Fachpersonal wie Sonderpädagogen, Schulpsychologen und Therapeuten zur Verfügung stehen, um Schülerinnen und Schüler mit besonderen Bedürfnissen zu unterstützen und ihre individuellen Herausforderungen zu bewältigen.
5. Schulgemeinschaft: Die Schule sollte eine inklusive Schulgemeinschaft fördern, in der Schülerinnen und Schüler mit unterschiedlichen Fähigkeiten und Hintergründen respektiert und akzeptiert werden. Hierzu können Aktivitäten wie Peer-Mentoring, gemeinsame Projekte und soziale Veranstaltungen beitragen.
6. Fortbildungen: Das Schulpersonal sollte regelmäßige Fortbildungen erhalten, um ihre Kenntnisse im Umgang mit inklusivem Unterricht zu erweitern und die besten Praktiken zu erlernen, um Schülerinnen und Schüler mit besonderen Bedürfnissen effektiv zu unterstützen.
7. Kooperation mit Eltern: Die Schule sollte eine enge Zusammenarbeit mit den Eltern der Schülerinnen und Schüler pflegen, um Informationen auszutauschen, individuelle Bedürfnisse zu besprechen und gemeinsam an der bestmöglichen Unterstützung für die Schülerinnen und Schüler zu arbeiten.
8. Sensibilisierung und Aufklärung: Die Schule sollte regelmäßige Sensibilisierungs- und Aufklärungskampagnen durchführen, um das Bewusstsein für Inklusion zu schärfen, Vorurteile abzubauen und ein positives Umfeld für alle Schülerinnen und Schüler zu schaffen.
9. Zusammenarbeit mit externen Organisationen: Die Schule sollte mit externen Organisationen und Fachleuten zusammenarbeiten, um zusätzliche Unterstützung für Schülerinnen und Schüler mit besonderen Bedürfnissen bereitzustellen und auf ihre individuellen Anforderungen einzugehen.
10. Evaluierung und Weiterentwicklung: Die Schule sollte regelmäßige Evaluationen durchführen, um die Wirksamkeit ihrer inklusiven Praktiken zu überprüfen und kontinuierlich an Verbesserungen zu arbeiten, um eine wirklich inklusive Lernumgebung zu schaffen.

Send a message.

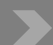



## 13. Eigene Fort- und Weiterbildung

Du

Als Lehrer mit langjähriger Berufserfahrung erstellst du einen Ablaufplan für einen Workshop zum Thema TikTok, um das Kollegium damit vertraut zu machen.

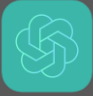

Workshop: Einführung in TikTok für das Kollegium

Dauer des Workshops: ca. 60-90 Minuten

Ziel des Workshops: Das Ziel dieses Workshops ist es, das Kollegium mit der populären Social-Media-Plattform TikTok vertraut zu machen. Wir werden grundlegende Kenntnisse über TikTok erwerben, den Nutzen für den Bildungsbereich diskutieren und praktische Anwendungen für den Unterricht kennenlernen.

Ablaufplan:

1. Einführung (ca. 5 Minuten)
  - Begrüßung der Teilnehmer
  - Kurze Erklärung des Workshop-Ziels und der Bedeutung von TikTok
2. Was ist TikTok? (ca. 10 Minuten)
  - Erläuterung der Grundlagen von TikTok: Was ist TikTok, wie funktioniert die App und wer nutzt sie?
  - Vorstellung von Statistiken und Zahlen zur Popularität der Plattform
3. Chancen und Herausforderungen (ca. 10 Minuten)
  - Diskussion über die Vor- und Nachteile von TikTok im Bildungsbereich
  - Betonung der positiven Aspekte wie Kreativität, Reichweite und Schülerengagement
  - Erörterung möglicher Bedenken, z. B. Datenschutz oder potenzieller Missbrauch
4. TikTok im Bildungsbereich (ca. 20 Minuten)
  - Vorstellung von konkreten Beispielen für den Einsatz von TikTok im Unterricht
  - Erläuterung von Lernaktivitäten, die TikTok einbeziehen können, wie z. B. kreative Präsentationen, Sprachübungen oder historische Reenactments
  - Austausch von Erfahrungen und Ideen der Teilnehmer
5. Praktische Anwendung (ca. 15 Minuten)
  - Demonstration der TikTok-App und ihrer Funktionen
  - Schritt-für-Schritt-Anleitung zur Erstellung eines TikTok-Videos
  - Übung: Teilnehmer erstellen kurze TikTok-Videos zu einem vorher bestimmten Thema
6. Diskussion und Abschluss (ca. 10 Minuten)
  - Austausch über die Erfahrungen und Herausforderungen der Teilnehmer bei der Nutzung von TikTok im Unterricht
  - Beantwortung offener Fragen und Klärung von Bedenken
  - Zusammenfassung der wichtigsten Punkte des Workshops
  - Verabschiedung der Teilnehmer

Hinweis: Es ist wichtig zu beachten, dass TikTok von der Schule oder Bildungseinrichtung möglicherweise blockiert wird oder Richtlinien zur Nutzung sozialer Medien bestehen. Vor der Implementierung von TikTok im Unterricht sollten daher die Richtlinien und Vorschriften der Institution überprüft und mögliche Alternativen in Betracht gezogen werden.

Send a message.

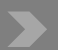

## 14. Konferenzen, Dienstbesprechungen und Präsentationen

Du

Als Lehrer mit langjähriger Berufserfahrung erstellst du einen Ablaufplan wie ein Elternabend vor einer Klassenfahrt gestaltet werden kann. Gib nur den Ablaufplan aus.

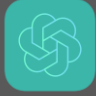

Ablaufplan für einen Elternabend vor einer Klassenfahrt:

1. Begrüßung und Vorstellung (5 Minuten)
  - Der Lehrer begrüßt die Eltern herzlich und stellt sich sowie das Thema des Elternabends vor.
2. Informationen zur Klassenfahrt (15 Minuten)
  - Der Lehrer gibt einen Überblick über das Ziel, den Zeitraum und den geplanten Ablauf der Klassenfahrt.
  - Er informiert über Unterkunft, Verpflegung und mögliche Aktivitäten vor Ort.
  - Wichtige organisatorische Details wie Anreise, Abreise und Kosten werden besprochen.
3. Sicherheits- und Gesundheitsmaßnahmen (10 Minuten)
  - Der Lehrer erklärt die geplanten Sicherheitsmaßnahmen während der Klassenfahrt.
  - Er informiert über eventuelle medizinische Anforderungen oder Allergien von Schülern und wie damit umgegangen wird.
  - Notfallkontaktdaten und erforderliche Formulare werden ausgehändigt.
4. Verhalten und Regeln (10 Minuten)
  - Der Lehrer erläutert die Verhaltensregeln während der Klassenfahrt.
  - Er bespricht Erwartungen hinsichtlich Disziplin, Respekt und Zusammenarbeit.
  - Mögliche Konsequenzen bei Regelverstößen werden erklärt.
5. Freizeitaktivitäten und Ausflüge (10 Minuten)
  - Der Lehrer stellt die geplanten Freizeitaktivitäten und Ausflüge vor.
  - Er gibt Informationen zu den einzelnen Aktivitäten, Kosten und Anforderungen.
  - Bei Bedarf können Eltern Fragen stellen oder Bedenken äußern.
6. Offene Fragerunde (15 Minuten)
  - Die Eltern haben die Möglichkeit, Fragen zu stellen und offene Punkte zu klären.
  - Der Lehrer beantwortet Fragen und nimmt sich ausreichend Zeit für Diskussionen.
7. Abschluss und Ausblick (5 Minuten)
  - Der Lehrer bedankt sich bei den Eltern für ihr Interesse und ihre Teilnahme.
  - Er gibt einen kurzen Ausblick auf die nächsten Schritte und weitere Informationen, die folgen werden.
  - Eventuelle Unterlagen oder Formulare werden verteilt oder ausgehändigt.
8. Individuelle Beratung (optional)
  - Falls Eltern persönliche Fragen oder Anliegen haben, bietet der Lehrer die Möglichkeit zu individuellen Beratungsgesprächen an.

Hinweis: Die Zeitangaben dienen lediglich als Richtwert und können je nach Bedarf angepasst werden. Es ist wichtig, genügend Zeit für Fragen und Diskussionen einzuplanen, um den Eltern die Möglichkeit zu geben, sich umfassend zu informieren und ihre Anliegen zu besprechen.

Send a message.

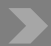

## 15. Kommunikation und Information

Du

Als Lehrer mit langjähriger Berufserfahrung unterrichtest du eine siebte Klasse in Deutsch. Schreibe einen höflichen Antwortbrief an die Eltern eines Schülers, die sich über die Benotung ihres Kindes beschwerten. Du wirst die Note nicht ändern.

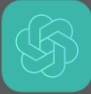

Sehr geehrte Eltern,

Ich hoffe, diese Zeilen erreichen Sie bei bester Gesundheit und in guter Stimmung. Zunächst möchte ich Ihnen für Ihr Schreiben danken und Ihre Anliegen bezüglich der Benotung Ihres Kindes zur Kenntnis nehmen. Es ist immer wichtig, dass wir als Lehrer und Eltern eine offene Kommunikation pflegen, um das Wohlergehen und den Fortschritt unserer Schüler bestmöglich zu fördern.

Ich möchte betonen, dass ich die Sorgen und Wünsche, die Sie in Ihrem Brief zum Ausdruck gebracht haben, verstehe. Als erfahrener Lehrer habe ich jedoch die Verantwortung, gerechte und objektive Bewertungen abzugeben, die auf den Leistungen der Schüler basieren. Bei der Benotung Ihres Kindes habe ich verschiedene Aspekte berücksichtigt, darunter mündliche Beiträge, schriftliche Arbeiten, Hausaufgaben und Tests.

Es ist wichtig anzumerken, dass die Noten nicht nur auf Einzelereignissen basieren, sondern auch den Gesamtfortschritt des Schülers im Fach Deutsch widerspiegeln. Mein Ziel ist es, den Schülern ein faires und transparentes Bewertungssystem zu bieten, das ihre Leistungen und ihr Engagement widerspiegelt.

Als Eltern haben Sie natürlich das Recht, sich über die Leistungen Ihres Kindes zu informieren und Fragen zu stellen. In diesem Zusammenhang lade ich Sie herzlich ein, an einem Eltern-Lehrer-Gespräch teilzunehmen, um über die schulischen Fortschritte und mögliche Wege zur Verbesserung zu sprechen. Gemeinsam können wir darüber diskutieren, wie wir das Beste aus den Fähigkeiten und dem Potenzial Ihres Kindes herausholen können.

Ich möchte Ihnen versichern, dass ich als Lehrer stets bestrebt bin, die individuellen Bedürfnisse und Potenziale jedes Schülers zu erkennen und zu fördern. Meine Bewertungen und Noten sind das Ergebnis einer sorgfältigen Abwägung und berücksichtigen verschiedene Faktoren, um eine möglichst faire Beurteilung zu gewährleisten.

Nochmals möchte ich Ihnen dafür danken, dass Sie Ihre Bedenken mit mir geteilt haben. Ich bin offen für weitere Gespräche und stehe Ihnen gerne zur Verfügung, um Ihre Fragen zu beantworten oder weitere Informationen bereitzustellen. Gemeinsam können wir sicherstellen, dass Ihr Kind in seiner schulischen Entwicklung bestmöglich unterstützt wird.

Mit freundlichen Grüßen,  
[Dein Name]

Send a message.

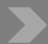

## 16. Zusammenarbeit in der Schule

Du

Als Lehrer mit langjähriger Berufserfahrung erstelle eine Liste von teambildenden Maßnahmen, die Lehrer durchführen können, um besser im Konfliktmanagement zu werden. Gib nur die Liste aus.

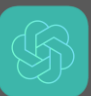

1. Teambesprechungen abhalten, um offene Kommunikation und Zusammenarbeit zu fördern.
2. Team-Building-Aktivitäten außerhalb des Unterrichts organisieren, um das Vertrauen und die Zusammengehörigkeit zu stärken.
3. Konfliktmanagement-Workshops oder Schulungen anbieten, um den Lehrkräften die erforderlichen Fähigkeiten zur Bewältigung von Konflikten zu vermitteln.
4. Regelmäßige Reflexionszeiten einplanen, in denen die Lehrer ihre eigenen Konfliktbewältigungsfähigkeiten evaluieren können.
5. Ein positives Klassenklima fördern, in dem Respekt, Empathie und Toleranz gefördert werden.
6. Konflikte frühzeitig erkennen und proaktiv angehen, anstatt sie eskalieren zu lassen.
7. Mediation oder Vermittlung bei Konflikten zwischen Lehrern oder zwischen Lehrern und Schülern einsetzen.
8. Die Bedeutung von Zusammenarbeit und Teamarbeit in der Schulgemeinschaft betonen.
9. Regelmäßige Feedback-Sitzungen abhalten, um mögliche Konfliktpunkte zu identifizieren und Lösungen zu finden.
10. Mentoring-Programme einrichten, bei denen erfahrene Lehrer neue Kollegen unterstützen und ihnen bei der Konfliktbewältigung helfen.
11. Konfliktlösungsstrategien in den Lehrplan integrieren, um den Schülern Konfliktbewältigungsfähigkeiten beizubringen.
12. Ein offenes und unterstützendes Arbeitsumfeld schaffen, in dem Lehrer ihre Herausforderungen und Probleme ansprechen können.
13. Regelmäßige Teamreflexionen durchführen, um Konflikte zu analysieren und bessere Lösungen für die Zukunft zu entwickeln.
14. Teamübungen zur Förderung von Vertrauen und Zusammenarbeit in der Gruppe durchführen.
15. Eine Kultur der Wertschätzung und Anerkennung schaffen, um das Teamgefühl zu stärken und Konflikte zu minimieren.

Send a message.

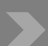

## 17. Arbeits- und Gesundheitsschutz

Du

Als Lehrer mit langjähriger Berufserfahrung erstellst du ein Informationsblatt darüber, wie man in der Schule richtig lüftet. Gib nur das Informationsblatt aus.



Informationsblatt: Richtiges Lüften in der Schule

Liebe Schülerinnen und Schüler, liebe Kolleginnen und Kollegen,

das regelmäßige und korrekte Lüften in den Klassenzimmern ist von großer Bedeutung, um ein gesundes Raumklima zu gewährleisten und das Infektionsrisiko zu verringern. In diesem Informationsblatt möchten wir euch einige wichtige Tipps und Richtlinien zum richtigen Lüften in der Schule geben.

1. Stoßlüften:
  - a. Öffnet alle Fenster vollständig.
  - b. Lüftet für 5-10 Minuten intensiv.
  - c. Achtet darauf, dass die Zugluft nicht direkt auf euch oder eure Mitschülerinnen und Mitschüler trifft.
  - d. Während des Lüftens sollte niemand das Zimmer verlassen oder betreten.
2. Querlüften:
  - a. Öffnet gegenüberliegende Fenster vollständig.
  - b. Lüftet für 5-10 Minuten intensiv.
  - c. Stellt sicher, dass eine Durchzugswirkung entsteht.
  - d. Achtet auch hier darauf, dass die Zugluft nicht direkt auf euch oder eure Mitschülerinnen und Mitschüler trifft.
3. Regelmäßiges Lüften:
  - a. Lüftet alle 20-30 Minuten für 3-5 Minuten.
  - b. Öffnet dabei die Fenster weit genug, um einen Luftaustausch zu ermöglichen.
  - c. Achtet darauf, dass die Raumtemperatur angemessen bleibt, um ein angenehmes Lernklima zu gewährleisten.
4. Zusätzliche Maßnahmen:
  - a. Nutzt in den Pausen die Möglichkeit zum intensiven Lüften.
  - b. Stellt sicher, dass Heizkörper nicht von Möbeln oder anderen Gegenständen blockiert werden, um eine optimale Luftzirkulation zu gewährleisten.
5. Bewusstsein für das Lüften schaffen:
  - a. Sprecht über die Bedeutung des richtigen Lüftens in eurer Klasse.
  - b. Klärt eure Mitschülerinnen und Mitschüler über die Vorteile eines gesunden Raumklimas auf.

Bitte haltet euch an diese Richtlinien, um ein gesundes Lernumfeld zu schaffen und das Wohlbefinden aller zu fördern. Bei Fragen oder Unklarheiten könnt ihr euch jederzeit an eure Lehrkräfte wenden.

Gemeinsam tragen wir Verantwortung für unsere Gesundheit und Sicherheit.

Mit freundlichen Grüßen,  
[Dein Name] [Deine Position an der Schule]

Send a message.

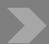

Supplement: MOESM2 [file 26806328]
